## ORIGINAL RESEARCH

### **Dietary diversity moderates household economic inequalities in the double burden of malnutrition in Tanzania**

Sanmei Chen, PhD<sup>1\*</sup>, Yoko Shimpuku, PhD<sup>1</sup>, Takanori Honda, PhD<sup>2</sup>, Dorkasi L. Mwakawanga, MSc<sup>1,3</sup>, Beatrice Mwilike, PhD<sup>3</sup>

#### Affiliations:

1. Global Health Nursing, Graduate School of Biomedical and Health Sciences, Hiroshima University, Japan
2. Center for Cohort Studies, Graduate of Medical Sciences, Kyushu University, Japan
3. Department of Community Health Nursing, School of Nursing, Muhimbili University of Health and Allied Sciences, Tanzania

#### \*Correspondence to:

Sanmei Chen, PhD

Global Health Nursing, Graduate School of Biomedical and Health Sciences,  
Hiroshima University, 1-2-3 Kasumi, Minami Ward, Hiroshima 734-8553, Japan

Email: [chens@hiroshima-u.ac.jp](mailto:chens@hiroshima-u.ac.jp)

Phone: +81-82-257-5377

Word account:

Abstract: 300

Main text: 3,578

Number of tables: 2

Number of figures: 2

Supplemental material: 2 supplemental tables, 3 supplemental figures

### **What is already known on this topic?**

The double burden of undernutrition and obesity is increasing in low- and middle-income countries and has serious and lasting developmental and socioeconomic impact.

Household economic inequalities have been linked to the double burden of malnutrition (DBM) at the household level. However, existing evidence is conflicting and limited in Tanzania.

Diversified diet may mitigate the potential adverse impact of household economic inequalities on DBM; however, evidence is scarce.

### **What this study adds?**

This study is one of the few attempts to explore economic inequalities in DBM at the household level in Tanzania by considering the moderating role of dietary diversity in these inequalities.

The prevalence of DBM varies regionally and is unequally distributed across levels of household wealth nationwide in Tanzania. Greater household wealth is associated with higher DBM; however, achieving minimum dietary diversity mitigates the negative impact of household wealth on DBM.

### **How this study might affect research, practice or policy?**

This study provide evidence that supports the hypothesis that dietary diversity might be an underrated action target for addressing DBM.

Our findings encourage the implementation of double-duty approaches that simultaneously tackle different forms of malnutrition through operations such as nutrition education interventions for mothers with young children and relevant public health nutrition programs and policies in Tanzania.

1 **Abstract**

2 **Background:** Improved food availability and a growing economy in Tanzania  
3 may insufficiently decrease preexisting nutritional deficiencies and  
4 simultaneously increase overweight within the same individual, household, or  
5 population, causing a double burden of malnutrition (DBM). We investigated  
6 economic inequalities in DBM at the household level, expressed as a stunted  
7 child with an overweight/obese mother, and the moderating role of dietary  
8 diversity in these inequalities.

9 **Methods:** We used cross-sectional data of 2,867 children (aged 6–23 months)  
10 and their mothers (aged 15–49 years) from the 2015–2016 Tanzania  
11 Demographic and Health Survey. The participants were categorized into two  
12 groups based on their dietary diversity score: achieving and not achieving  
13 minimum dietary diversity. We assessed the interaction effect between  
14 household wealth and dietary diversity on DBM and examined the association  
15 between household wealth and DBM in subgroups based on achieving  
16 minimum dietary diversity. Logistic regression models with sample weights and  
17 restricted cubic spline functions were used for the analysis.

18 **Results:** The prevalence of DBM was 5.6% (SD=0.6) and significantly varied by  
19 regions (ranging from 0.6%–12.2%). Significant interaction was observed  
20 between dietary diversity and household wealth index ( $p$  for interaction = 0.01).  
21 The prevalence of DBM monotonically increased with greater household wealth  
22 among those who did not achieve minimum dietary diversity ( $p$  for trend =  
23 0.002; however, but this association was attenuated in those who achieved  
24 minimum dietary diversity ( $p$  for trend = 0.15), particularly for the richest

25 households ( $p = 0.43$ ). Similar results were observed when modeling the  
26 household wealth index score as a continuous variable (odds ratio [95%  
27 confidence interval]: 2.05 [1.32-3.19] for non-achievers of minimum dietary  
28 diversity, 1.39 (0.76—2.54) for achievers).

29 **Conclusions:** Greater household wealth was associated with higher odds of  
30 DBM in Tanzania; however, achieving minimum dietary diversity may mitigate  
31 the negative impact of household economic status on DBM.

32 **Keywords:** Malnutrition; dietary diversity; Tanzania; household wealth

## 1 INTRODUCTION

2 Countries worldwide are now experiencing a fast-evolving and more complex  
3 nutrition paradigm.<sup>1</sup> Instead of focusing on a single side of malnutrition,  
4 combating all forms of malnutrition is among the top priorities of the United  
5 Nations Decade of Action on Nutrition and the Sustainable Development Goals  
6 (SDGs, Target 2.2).<sup>2,3</sup> Undernutrition and overweight or obesity have been  
7 historically addressed as separate challenges affecting distinct populations with  
8 contrast risk factors.<sup>4</sup> However, the changing global nutrition reality is that these  
9 two distinct forms of malnutrition frequently coexist within individuals,  
10 households, and populations, with common mechanisms (e.g., economic  
11 inequalities<sup>5</sup>) and consequences on health.<sup>4</sup> This growing recognition in the  
12 global health community forms the basis of the emerging concept of double  
13 burden of malnutrition (DBM).<sup>6,7</sup> This global double burden of undernutrition and  
14 obesity and its great developmental and socioeconomic impact have been  
15 recognized as serious and lasting in low- and middle-income countries (LMICs)  
16 undergoing rapid nutrition transition<sup>8-10</sup>; however, they have not yet been  
17 examined extensively.

18 Tanzania is experiencing improved food availability as its economy is  
19 growing rapidly. Economic transition with an increased average household  
20 income enables more households to purchase more food<sup>11</sup>, which potentially  
21 improves undernutrition. However, the rates of decline in undernutrition (e.g.,  
22 stunting from 34.4% in 2014 to 31.8% in 2018) in children under age five in  
23 Tanzania are still too slow to meet the SDG targets by 2030.<sup>12</sup> Even worse, the  
24 prevalence of underweight increased from 13.7% in 2014 to 14.6% in 2018.<sup>12</sup>

25 Simultaneously overweight and obesity is rapidly growing, affecting over 40% of  
26 Tanzanian women aged 15–49 years,<sup>12</sup> perhaps mainly due to very rapid  
27 changes in the food system in Tanzania (e.g., the availability of cheap ultra-  
28 processed fast food and beverages).<sup>13</sup> This co-occurrence of undernutrition and  
29 obesity may increase DBM in Tanzania.<sup>14</sup>

30 DBM at the household-level is defined as multiple family members  
31 affected by different forms of malnutrition.<sup>8</sup> Household-level DBM varies  
32 between countries and often arises in lower-middle-income countries including  
33 Tanzania<sup>15</sup>. Evidence showed that the prevalence of the total household-level  
34 DBM ranged between 3% and 35% across 126 LMICs, with stunted child-  
35 overweight mother pairs being the most prevalent DBM type (ranging between  
36 1% and 24%).<sup>15,16</sup> Household-level DBM has been shown to be primarily driven  
37 by socioeconomic inequalities; however, the effect of household economic  
38 status on DBM is heterogeneous.<sup>17–21</sup> In poorer LMICs higher household  
39 economic levels were linked to increased odds of DBM, while in richer LMICs  
40 lower household economic levels were associated with higher odds of DBM.<sup>22</sup>  
41 In Tanzania, it remains uncertain how household economic inequalities are  
42 associated with DBM. A bivariate analysis in Tanzania reported a 1.4 times  
43 higher crude likelihood of DBM among richer households; however, this study  
44 did not quantify this association while accounting for important household  
45 characteristics such as place of residence.<sup>14</sup>

46 Evidence regarding the critical factors that could help explain the link  
47 between household economic inequalities and DBM is lacking<sup>17–22</sup>. However,  
48 some dietary factors have been proposed to explain this link (e.g., food



49 expenditure, changing eating habits, and the replacement of powder milk with  
50 breastfeeding).<sup>4,5,15</sup> Dietary diversity, a proxy indicator for diet metrics, is  
51 hypothesized to be an underrated action target for addressing DBM<sup>23,24</sup>,  
52 especially among populations with diets based on starchy staples<sup>25</sup> including  
53 Tanzanians. Generally, dietary diversity increases as household income  
54 increases<sup>25</sup>, thus improving nutrient adequacy and diet-related health  
55 outcomes<sup>26</sup>. Paradoxically, in emerging economies increased household  
56 income can worsen diet-related health outcomes due to poor dietary diversity<sup>27</sup>  
57 and other lifestyle, social, and ecological factors<sup>4</sup>. Whether diversified diet can  
58 mitigate the potential adverse impact of increased household wealth on DBM in  
59 Tanzania remains unknown.

60 We aimed to address this gap by investigating household economic  
61 inequalities in the DBM in Tanzania, expressed as a stunted child with an  
62 overweight/obese mother, and test whether dietary diversity modifies the  
63 association between household economic status and DBM. We hypothesized  
64 that higher household wealth is associated with higher odds of DBM but that  
65 this association is attenuated by a diversified diet.

66

## 67 **METHODS**

### 68 **Data**

69 We obtained cross-sectional data from the 2015–2016 Tanzania Demographic  
70 and Health Survey (DSH), provided by the United States Agency for  
71 International Development.<sup>28</sup> The data are from nationally representative  
72 household surveys of girls and women of productive age (15–49 years) and

73 their children born in the five years preceding the survey, using a stratified two-  
74 stage cluster sampling method. This sampling technique allowed each  
75 household to have an equal probability of participating in the survey. In the  
76 present study, we used the dataset for children under the age of five and their  
77 mothers. This dataset provides anthropometric information for each child , as  
78 well as the characteristics of the mother and household (n = 10,233).<sup>29</sup> For the  
79 analysis, we included children aged 6–23 months old (n = 3,320), who were  
80 recommended by the WHO as key targets for assessing infant and young child  
81 feeding practices using diet quality indicators such as dietary diversity.<sup>30</sup> We  
82 excluded children who were not alive (n = 137), children who were not living  
83 with their mothers (n = 47), and children with height missing values (n = 55).  
84 Moreover, we excluded mothers who were pregnant (n = 207) and those with  
85 missing values of weight or height (n = 7). Our final sample consisted of 2,867  
86 child-mother pairs (weighted sample size: n = 2,850) (see Supplemental Figure  
87 S1). Ethical approval was not required because the analysis used publicly  
88 available DHS data.

89

### 90 **Double burden of malnutrition**

91 DBM can occur in different scenarios, including when a child is both stunted and  
92 overweight, when a child is wasted with an overweight mother, when a child is  
93 stunted with an overweight mother, or when a child is overweight with an  
94 underweight mother.<sup>15</sup> In this analysis, we defined DBM as a child being stunted  
95 with an overweight mother in the same household, as this is the most prevalent  
96 measure of household-level DBM in LMICs.<sup>15,22</sup> A child was considered stunted

97 if their height-for-age Z-score was below minus two standard deviations (-2 SD)  
98 from the WHO Child Growth Standards median Z-score. A mother was  
99 considered overweight if her body mass index (BMI) was 25 kg/m<sup>2</sup> or higher.  
100 The DBM variable was coded 1 if a child was stunted and the mother was  
101 overweight, and 0 otherwise.

102

### 103 **Household economic status**

104 Household economic affluence was measured using the DHS wealth index. The  
105 DHS wealth index is a composite measure of relative household economic  
106 status, constructed using household-level information on ownership of selected  
107 assets, such as television and bicycles, materials for housing construction, and  
108 type of water access and sanitation facilities.<sup>31</sup> It is one of the most useful  
109 indicators of household financial well-being in LMICs where it is difficult to  
110 obtain accurate data on household income from surveys. This is because a  
111 significant portion of the population in LMICs do not receive market level  
112 transactions and engage in significant home production.<sup>21</sup> A continuous  
113 measure of relative wealth (i.e., wealth index factor score) was assessed for  
114 each household using principal component analysis.<sup>28,29</sup> Based on the  
115 distribution of the wealth index factor score in the whole survey sample of the  
116 2015-2016 Tanzania, all households were categorized into five quintiles (i.e.,  
117 the wealth index quintiles).<sup>28,29</sup>

118

### 119 **Dietary diversity**

120 Dietary diversity is a commonly used indicator of diet quality estimated using the  
121 number of different food groups consumed over a given reference period.<sup>30</sup>  
122 Minimum dietary diversity was defined according to the DHS statistics guide as  
123 feeding the child with  $\geq 5$  out of the following eight food groups during the day  
124 or night preceding the survey: breastmilk; grains, roots, and tubers; legumes  
125 and nuts; dairy products (infant formula, milk, yogurt, cheese); flesh foods (meat,  
126 fish, poultry and liver/organ meats); eggs; fruits and vegetables rich in vitamin  
127 A; and other fruits and vegetables.<sup>32</sup> The participants were categorized into two  
128 groups: achieving and not achieving minimum dietary diversity.

129

### 130 **Covariates**

131 We considered the following demographic and socio-economic covariates that  
132 may affect both household economic status and the presence of DBM: the  
133 mother's age (in years), education (no completed education, completed primary  
134 education, or completed secondary education and above), marital status (never  
135 married, currently married, formerly married), place of residence (urban or rural),  
136 whether the mother was currently breastfeeding a child (yes or no), number of  
137 children in the household, child's age (in months) and sex (male or female), and  
138 the number of household members.

139

### 140 **Statistical analysis**

141 All statistical analyses were performed using the SAS software (version 9.4;  
142 SAS Institute, Cary, North Carolina, USA) and R version 4.3.0 (R Foundation for  
143 Statistical Computing). All analyses were weighted using sampling weights,

144 which considered the stratified cluster sampling design and non-response rate.  
145 The prevalence of DBM by region was illustrated as a choropleth map, and  
146 regional differences were tested using  $\chi^2$  tests. We summarized the sample  
147 characteristics according to quintiles of the wealth index among non-achievers  
148 and achievers of minimum dietary diversity. Descriptive statistics were  
149 presented as weighted means and standard errors (SEs) for continuous  
150 variables, and weighted frequencies (%) and their SEs for categorical variables.  
151 We compared the sample characteristics among quintiles of household wealth  
152 index using  $\chi^2$  tests for categorical variables and one-way analysis of variance  
153 for continuous variables.

154 We built logistic regression models for stratified cluster sampling to  
155 assess the odds ratios (OR) and 95% confidence intervals (CI) of DBM  
156 according to the household wealth index levels. Given that there were too few  
157 cases of DBM among child–mother pairs who achieved minimum dietary  
158 diversity in the poorest group to build logistic regression models, we combined  
159 the poorest group with the poorer group. We used both a continuous estimate of  
160 the wealth index score and groups of the wealth index as independent variables  
161 in separate models. Firstly, we performed unadjusted analyses. We then  
162 adjusted the models for covariates at baseline, namely, the mother’s age and  
163 education, marital status, place of residence, whether the mother was currently  
164 breastfeeding a child, number of children in the household, child’s age and sex,  
165 and the number of household members. We tested the trend in the association  
166 between wealth index and DBM by assigning ordinal numbers (0, 1, 2, and 3) to  
167 the groups of the wealth index categories and modeled this as a continuous

168 variable. Based on the hypothesis that the household wealth index might exhibit  
169 varying associations with DBM depending on the presence of minimum dietary  
170 diversity, we initially tested the heterogeneity in the associations between the  
171 two groups of minimum dietary diversity. This was achieved by adding a  
172 multiplicative interaction term (minimum dietary diversity  $\times$  household wealth  
173 index) to the multivariable-adjusted model. We tested this interaction effect  
174 using the likelihood ratio test by comparing the log-likelihood of the model  
175 containing the interaction term and that of the model not containing the  
176 interaction term. Statistical tests were two-sided, and a  $p$ -value for the  
177 interaction term  $< 0.05$  was considered statistically significant. We conducted  
178 primary analyses separately for non-achievers and achievers of minimum  
179 dietary diversity. We performed a restricted cubic spline analysis without  
180 assuming a linear association between the wealth index score and the DBM to  
181 visualize the shape of this association. We placed four knots at the 20th, 40th,  
182 60<sup>th</sup>, and 80th percentiles of the wealth index score. The 20th percentile was set  
183 as the reference value. Collinearity between independent variables was  
184 checked using the variance inflation factor test.

185 We performed two sensitivity analyses: (1) additionally adjusting for  
186 region to account for the potential confounding effect in which the association  
187 between household wealth and DBM is attributed to regional differences only  
188 and (2) removing the variable of place of residence from the covariates to  
189 address the potential collinearity between place of residence and the household  
190 wealth index (with a variance inflation factor value = 2.3).

191

192 **RESULTS**

193 The estimated prevalence (SE) of DBM (stunted children with overweight/obese  
194 mother) was 5.6% (0.6) in the whole sample. The prevalence of child stunting  
195 and mother overweight was 21.3% (1.0) and 31.1% (1.2), respectively. Figure 1  
196 shows the regional distribution of the DBM prevalence in Tanzania, which  
197 ranged from the lowest rate of 0.6% in Manyara to the highest rate of 12.2% in  
198 Kusini Unguja, with significant regional differences ( $p = 0.03$ ). In total, 21.3% of  
199 the sample achieved minimum dietary diversity. The estimated prevalence (SE)  
200 of DBM was 5.8% (0.5) among non-achievers of minimum dietary diversity and  
201 6.9% (1.0) among achievers of minimum dietary diversity.

202 Table 1 shows the characteristics of child–mother pairs according to the  
203 quintiles of the household wealth index among non-achievers and achievers of  
204 minimum dietary diversity. In both groups, households with a higher wealth  
205 index were more likely to have mothers with higher education, had few living  
206 children and household members, lived in urban areas, and were less likely to  
207 breastfeed. They were also more likely to have children with lower mean values  
208 of height-for-age and mothers with higher mean values of BMI. In the group that  
209 did not achieve minimum dietary diversity, households with a higher wealth  
210 index were more likely to have mothers who were younger, never married, or  
211 formerly married.

212 Figure 2 shows the prevalence of DBM according to the household  
213 wealth level among who achieved minimum dietary diversity and those who did  
214 not. The prevalence of DBM showed a statistically significant increase with  
215 increasing household wealth index among those who did not achieve minimum

216 dietary diversity. However, this was not observed among achievers of minimum  
217 dietary diversity. The DBM prevalence reached a plateau in the richer group  
218 and then decreased in the richest group.

219 Table 2 shows the association between the household wealth index and  
220 DBM in unadjusted and multivariable-adjusted models. The interaction tests  
221 showed the associations of household wealth index with DBM significantly  
222 differed by minimum dietary diversity, with  $p$  for interaction  $< 0.05$  in both  
223 unadjusted and adjusted analyses. Specifically, the multivariable-adjusted odds  
224 of DBM in non-achievers of minimum dietary diversity were approximately two  
225 times higher for the middle and richer groups, and more than five times higher  
226 in the richest group, as compared with the combined poorest and poorer groups  
227 ( $p$  for trend = 0.02). However, the multivariable-adjusted odds of DBM among  
228 achievers of minimum dietary diversity were not statistically different in the  
229 middle and the richest groups, but they were approximately five times higher in  
230 the richer group. Similar results were observed when modeling the continuous  
231 variable of the wealth index score (mean [SD]: 0.16 [0.94]) as the independent  
232 variable instead of the categories of the wealth index, with an OR (95%CI) per  
233 unit increase in the wealth index score of 2.05 (1.32-3.19) in non-achievers of  
234 minimum dietary diversity and an OR (95%CI) of 1.39 (0.76-2.54) in achievers  
235 of minimum dietary diversity. Restricted cubic spline analyses showed a similar  
236 shape association between the wealth index score and DBM among non-  
237 achievers and achievers of minimum dietary diversity (see Supplemental Figure  
238 3). The prevalence of child stunting decreased as household wealth increased,  
239 especially among achievers of minimum dietary diversity. However, the



240 prevalence of mother overweight significantly increased with the household  
241 wealth levels in both non-achievers and achievers of minimum dietary diversity  
242 (see Supplemental Figure S2).

243 In the sensitivity analyses, the results did not materially change after  
244 further adjustment for region (see Supplemental Table S1) or removing the  
245 variable of place of residence from the covariates (see Supplemental Table S2).

246

## 247 **DISCUSSION**

248 This analysis demonstrated that the prevalence of household-level DBM varied  
249 regionally and was unequally distributed across levels of relative household  
250 wealth nationwide, and that these inequalities in DBM across levels of  
251 household wealth were moderated by minimum dietary diversity. Specifically,  
252 higher levels of relative household wealth were associated with higher odds of  
253 DBM when minimum dietary diversity was not achieved. This association was  
254 attenuated by achieving minimum dietary diversity. Our analysis quantified the  
255 association between household wealth and DBM among non-achievers and  
256 achievers of minimum dietary diversity, suggesting that household wealth  
257 increased DBM in the richest households in Tanzania; however, dietary  
258 diversity could potentially mitigate this negative impact. This study is one of the  
259 few attempts to examine the economic inequalities in DBM at the household  
260 level in Tanzania by considering the moderating role of dietary diversity in these  
261 inequalities.

262 Our observation of the prevalence of DBM (stunted child and overweight  
263 mother) at the household level in Tanzania is comparable to the results from

264 analyses of LMICs (5.6% vs. 6.0%).<sup>22</sup> However, our observations indicate  
265 relatively higher rates of DBM compared to LMICs in Asia, where the  
266 prevalence is mostly less than 1%.<sup>21</sup> This disparity may be primarily driven by  
267 the higher prevalence of maternal overweight in Tanzania. We also observed  
268 regional differences in the prevalence of DBM; DBM tended to be  
269 disproportionately concentrated in regions with relatively high economic  
270 development levels, such as Kusini Unguja, Mwanza, Tanga, and Dar es  
271 Salaam etc. This observation supports the assumption of the undesirable  
272 impact of macroeconomic development on DBM.<sup>21</sup> Our findings suggest the  
273 importance of accounting for regional variations into addressing DBM in  
274 Tanzania.

275         Our findings on the negative impact of household economic affluence on  
276 household-level DBM in Tanzania agree with findings from previous limited  
277 analysis of household level DBM in 55 LMICs worldwide<sup>22</sup> and 11 LMICs in  
278 Asia<sup>21</sup>, as well as other analyses using nationally representative data<sup>19,20</sup>.  
279 Nevertheless, other analyses showed no or opposite direction of the  
280 association<sup>17,18</sup>. Of note, no previous analysis has examined the interaction  
281 between household economic affluence and dietary factors in DBM. This study  
282 expands on existing evidence regarding the adverse impact of household  
283 wealth on DBM and demonstrates that dietary diversity could potentially  
284 alleviate these negative impact. This moderating effect of dietary diversity could  
285 be driven by the observed dramatic decrease in the child stunting rate among  
286 the richest households that embraced a minimum level of dietary diversity. A  
287 more diverse diet highly is correlated with higher intake of micronutrients among

288 children, thus helping prevent child stunting.<sup>25</sup> The dramatic decrease in child  
289 stunting in the richest households could be attributed to the fact that their  
290 mothers were more likely to have a higher level of nutritional literacy, in addition  
291 to more food expenditure to sustain a high overall quality of diet for their  
292 children.<sup>33</sup> We also observed a persistent increase in maternal overweight as  
293 household wealth increased, even among the group who achieved minimum  
294 dietary diversity. This result indicates that affluent Tanzanian women have a  
295 high level of total energy intake, regardless of dietary diversity. This finding  
296 could be partly explained by the cultural beliefs among Tanzanian women that  
297 associate overweight or obesity with beauty and consider it a symbol of success  
298 in life.<sup>34</sup> Our findings collectively support the hypothesis that dietary diversity  
299 might be an underrated action target for addressing DBM.<sup>23,24</sup>

300 A recent Lancet Commission advocated double-duty actions to  
301 simultaneously address different forms of malnutrition, aligning with the United  
302 Nations' SDGs and global nutrition targets.<sup>23,24</sup> However, the common  
303 mechanisms of DBM through which household economic affluence affects DBM  
304 have yet to be identified. Hypothesised pathways include impact on dietary  
305 quality, food environment, physical inactivity at transportation, and  
306 breastfeeding practices.<sup>4,13,15</sup> For instance, in emerging economies like  
307 Tanzania, high household income can lead to consuming fast and ultra-  
308 processed food with low-nutrient density and shifting into unhealthy eating  
309 habits<sup>35</sup>, thereby worsening diet-related health outcomes.<sup>27</sup> Our findings  
310 indicate that double-duty actions promoting dietary diversity for children while  
311 simultaneously reducing total energy intake among mothers could be an

312 effective strategy to address DBM in Tanzania. Additionally, the design of such  
313 double-duty actions should consider the uneven impact of economic affluence,  
314 as well as cultural and regional differences.

315         This study used a large nationally representative sample that provided  
316 robust estimates of the prevalence of DBM and relevant associations and  
317 enhanced the generalizability of our findings. We employed robust  
318 methodological approaches, including examining interactions between  
319 household wealth and dietary diversity and employing restricted cubic splines to  
320 avoid assuming linear associations. Our results remained robust under different  
321 sensitivity analyses, including further adjustment for region. However, this study  
322 has several limitations. The cross-sectional nature of the data precludes causal  
323 inferences. We did not include children aged two years and above because the  
324 DHS employed the WHO-designed indicator of minimum dietary diversity  
325 specifically for children 6–23 months<sup>30</sup>. Future studies should validate our  
326 findings among children aged 24–59 months and their mothers in LMICs using  
327 standardized indicators.<sup>36</sup> We used minimum dietary diversity for children as a  
328 proxy indicator at the household level since variables regarding the mother's  
329 diet were not available. In Tanzania, there is a food culture in which women and  
330 children eat from the same pot<sup>37</sup>, indicating that what mothers eat is strongly  
331 related to what their children eat.<sup>38</sup> Nevertheless, we could not rule out the  
332 possibility of misclassification of household minimum dietary diversity in our  
333 analysis, which may have led to an underestimation of the moderating effect of  
334 dietary diversity on DBM. While our study focused on the most prevalent form of  
335 DBM, it is crucial to recognize that other forms of DBM may exhibit different

336 associations with household economic status. The wealth index is a country-  
337 specific and relative measure of household wealth affluence. We urge caution  
338 when generalizing our findings to other countries.

339 In conclusion, the prevalence of household-level DBM was unequally  
340 distributed across regions of Tanzania and increased with higher household  
341 wealth. However, achieving minimum dietary diversity moderated the economic  
342 inequalities of DBM. Improved household economic status may increase DBM,  
343 but guaranteeing minimum dietary diversity could potentially address this  
344 negative impact. Our findings support and encourage the implementation of  
345 double-duty approaches that simultaneously tackle different forms of  
346 malnutrition through operations such as nutrition education interventions for  
347 mothers with young children and relevant public health nutrition programs and  
348 policies in Tanzania.

## References

1. High Level Panel of Experts on Food Security and Nutrition. *Food Security and Nutrition: Building a Global Narrative towards 2030.*; 2020.
2. UN. The United Nations Decade of Action on Nutrition: addressing the challenge. Published 2019. Accessed January 24, 2023.  
<https://www.un.org/nutrition/commitments>
3. Nilsson M, Griggs D, Visbeck M. Policy: Map the interactions between Sustainable Development Goals. *Nature*. 2016;534(7607):320-322.  
doi:10.1038/534320a
4. Wells JC, Sawaya AL, Wibaek R, et al. The double burden of malnutrition: aetiological pathways and consequences for health. *Lancet*. 2020;395(10217):75-88. doi:10.1016/S0140-6736(19)32472-9
5. Alao R, Nur H, Fivian E, Shankar B, Kadiyala S, Harris-Fry H. Economic inequality in malnutrition: A global systematic review and meta-analysis. *BMJ Glob Heal*. 2021;6(12):1-12. doi:10.1136/bmjgh-2021-006906
6. Khan SS, Ning H, Wilkins JT, et al. Association of body mass index with lifetime risk of cardiovascular disease and compression of morbidity. *JAMA Cardiol*. 2018;3(4):280-287. doi:10.1001/jamacardio.2018.0022
7. Demaio AR, Branca F. Decade of action on nutrition: Our window to act on the double burden of malnutrition. *BMJ Glob Heal*. 2017;3:e000492.  
doi:10.1136/bmjgh-2017-000492
8. World Health Organization. *The Double Burden of Malnutrition: Policy Brief.*; 2017.
9. Popkin BM, Horton S, Kim S, Mahal A, Shuigao J. Trends in diet,

- nutritional status, and diet-related noncommunicable diseases in China and India: the economic costs of the nutrition transition. 2001;59:379-390. doi:doi: 10.1111/j.1753-4887.2001.tb06967.x.
10. Nugent R, Levin C, Hale J, Hutchinson B. Economic effects of the double burden of malnutrition. *Lancet*. 2020;395(10218):156-164. doi:10.1016/S0140-6736(19)32473-0
  11. The World Bank. The World Bank in Tanzania. Published 2022. Accessed January 26, 2023. <https://www.worldbank.org/en/country/tanzania/overview>
  12. Ministry of Health Community Development Gender Elderly and Children, Ministry of Health, Tanzania Food and Nutrition Center, National Bureau of Statistics, Office of the Chief Government Statistician, UNICEF. *Tanzania National Nutrition Survey 2018*.; 2019.
  13. Pallangyo P, Mkojera ZS, Hemed NR, et al. Obesity epidemic in urban Tanzania: A public health calamity in an already overwhelmed and fragmented health system. *BMC Endocr Disord*. 2020;20(1):1-9. doi:10.1186/s12902-020-00631-3
  14. Faustini FT, Mniachi AR, Msengwa AS. Coexistence and correlates of forms of malnutrition among mothers and under-five child pairs in Tanzania. *J Nutr Sci*. 2022;11:1-8. doi:10.1017/jns.2022.103
  15. Popkin BM, Corvalan C, Grummer-Strawn LM. Dynamics of the double burden of malnutrition and the changing nutrition reality. *Lancet*. 2020;395(10217):65-74. doi:10.1016/S0140-6736(19)32497-3
  16. Garrett JL, Ruel MT. Stunted child-overweight mother pairs: Prevalence

- and association with economic development and urbanization. *Food Nutr Bull.* 2005;26(2):209-221. doi:10.1177/156482650502600205
17. Doak CM, Adair LS, Monteiro C, Popkin BM. Overweight and underweight coexist within households in Brazil, China and Russia. *J Nutr.* 2000;130(12):2965-2971. doi:10.1093/jn/130.12.2965
  18. Nakphong MK, Beltrán-Sánchez H. Socio-economic status and the double burden of malnutrition in Cambodia between 2000 and 2014: Overweight mothers and stunted children. *Public Health Nutr.* 2021;24(7):1806-1817. doi:10.1017/S1368980021000689
  19. Hong SA. Prevalence and regional variations of coexistence of child stunting and maternal overweight or obesity in Myanmar. *Public Health Nutr.* 2021;24(8):2248-2258. doi:10.1017/S136898002000186X
  20. Oddo VM, Rah JH, Semba RD, et al. Predictors of maternal and child double burden of malnutrition in rural Indonesia and Bangladesh. *Am J Clin Nutr.* 2012;95(4):951-958. doi:10.3945/ajcn.111.026070
  21. Fookien J, Vo LK. Exploring the macroeconomic and socioeconomic determinants of simultaneous over and undernutrition in Asia: An analysis of stunted child - overweight mother households. *Soc Sci Med.* 2021;269. doi:10.1016/j.socscimed.2020.113570
  22. Seferidi P, Hone T, Duran AC, Bernabe-Ortiz A, Millett C. Global inequalities in the double burden of malnutrition and associations with globalisation: a multilevel analysis of Demographic and Health Surveys from 55 low-income and middle-income countries, 1992–2018. *Lancet Glob Heal.* 2022;10(4):e482-e490. doi:10.1016/S2214-109X(21)00594-5



23. Miller V, Webb P, Micha R, Mozaffarian D. Defining diet quality: a synthesis of dietary quality metrics and their validity for the double burden of malnutrition. *Lancet Planet Heal.* 2020;4(8):e352-e370.  
doi:10.1016/S2542-5196(20)30162-5
24. Hawkes C, Ruel MT, Salm L, Sinclair B, Branca F. Double-duty actions: seizing programme and policy opportunities to address malnutrition in all its forms. *Lancet.* 2020;395(10218):142-155. doi:10.1016/S0140-6736(19)32506-1
25. Swindale A, Bilinsky P. *Household Dietary Diversity Score (HDDS) for Measurement of Household Food Access: Indicator Guide.*; 2006.  
doi:10.1017/CBO9781107415324.004
26. Verger EO, Le Port A, Borderon A, et al. Dietary diversity indicators and their associations with dietary adequacy and health outcomes: a systematic scoping review. *Adv Nutr.* 2021;12(5):1659-1672.  
doi:10.1093/advances/nmab009
27. Ren Y, Li H, Wang X. Family income and nutrition-related health: Evidence from food consumption in China. *Soc Sci Med.* 2019;232(April):58-76. doi:10.1016/j.socscimed.2019.04.016
28. USAID. DHS Overview. Accessed January 27, 2023.  
<https://dhsprogram.com/Methodology/Survey-Types/DHS.cfm>
29. Ministry of Health, Community Development, Gender, Elderly and Children (MoHCDGMinistry of Health, Community Development, Gender, Elderly and Children (MoHCDGEC) [Tanzania Mainland], Ministry of Health (MoH) [Zanzibar], National Bureau of Statistics (NBS) and I.

*Tanzania Demographic and Health Survey and Malaria Indicator Survey (TDHS-MIS) 2015-16.*; 2016.

30. WHO, UNICEF. *Global Nutrition Monitoring Framework. Operational Guidance for Tracking Progress in Meeting Targets for 2025.*; 2017.
31. Rutstein S. *The DHS: Approaches for Rural and Urban Areas.*; 2008.
32. USAID. Guide to DHS Statistics DHS-7: Minimum Dietary Diversity, Minimum Meal Frequency and Minimum Acceptable Diet. Published 2019. Accessed January 27, 2023. [https://dhsprogram.com/data/Guide-to-DHS-Statistics/Minimum\\_Dietary\\_Diversity\\_Minimum\\_Meal\\_Frequency\\_and\\_Minimum\\_Acceptable\\_Diet.htm](https://dhsprogram.com/data/Guide-to-DHS-Statistics/Minimum_Dietary_Diversity_Minimum_Meal_Frequency_and_Minimum_Acceptable_Diet.htm)
33. Mohsen H, Sacre Y, Hanna-Wakim L, Hoteit M. Nutrition and food literacy in the MENA region: a review to inform nutrition research and policy makers. *Int J Environ Res Public Health*. 2022;19:10190. doi:10.3390/ijerph191610190
34. Keding GB, Msuya JM, Maass BL, Krawinkel MB. Obesity as a public health problem among adult women in rural Tanzania. *Glob Heal Sci Pract*. 2013;1(3):359-371. doi:10.9745/GHSP-D-13-00082
35. Sauer CM, Reardon T, Tschirley D, et al. Consumption of processed food & food away from home in big cities, small towns, and rural areas of Tanzania. *Agric Econ (United Kingdom)*. 2021;52(5):749-770. doi:10.1111/agec.12652
36. Dlop L, Becquey E, Turowska Z, Huybregts L, Ruel MT, Gelli A. Standard minimum dietary diversity indicators for women or infants and young children are good predictors of adequate micronutrient intakes in 24-59-

- month-old children and their nonpregnant nonbreastfeeding mothers in rural Burkina Faso. *J Nutr.* 2021;151(2):412-422. doi:10.1093/jn/nxaa360
37. Forsythe L, Njau M, Martin A, Tomlins K, Forsythe L. *Staple Food Cultures: A Case Study of Cassava Ugali Preferences in Dar Es Salaam, Tanzania. Natural Resources Institute and CGIAR Research Program on Roots, Tubers and Bananas (RTB).*; 2017.
38. Hasan M, Islam MM, Mubarak E, Haque MA, Choudhury N, Ahmed T. Mother's dietary diversity and association with stunting among children <2 years old in a low socio-economic environment: A case-control study in an urban care setting in Dhaka, Bangladesh. *Matern Child Nutr.* 2019;15(2):1-8. doi:10.1111/mcn.12665

## **Contributors**

SC conceptualized and designed this study. SC performed the statistical analysis. SC, YS, and TH contributed to verification of the statistical results. SC, YS, TH, DLB, and BM contributed to the interpretation of the results. All authors had access to the data in the study. SC had primary responsibility for the final content. SC wrote the first draft of the manuscript, and all authors contributed to the manuscript revision.

## **Funding and disclaimer**

This work was supported by JSPS KAKENHI 23K16471 to SC. The funders had no role in the analysis and interpretation of data, the writing of the report, or in the decision to submit the paper for publication.

## **Competing interests**

We have no competing interests to declare.

## **Patient and public involvement**

Patients and/or the public were not involved in the design, or conduct, or reporting, or dissemination plans of this research.

## **Map disclaimer**

The map included in this research paper are for illustrative purposes only. The boundaries, names, and designations used in the maps do not imply official endorsement or acceptance by the authors or affiliated institutions. The

depiction of any specific geographic area, including political boundaries, does not imply any position regarding legal or political status. Users are advised to exercise caution and consult additional reliable sources for precise and up-to-date information. The authors and affiliated institutions bear no responsibility for any errors or omissions in the maps or for any consequences arising from the use or interpretation of the information presented.

### **Data availability statement**

This study used publicly available data that can be found online on their respective repositories: Demographic and Health Survey program (<https://dhsprogram.com/>). The compiled datasets, analysis files, and logs produced for this study are available from the corresponding author upon request.

### **ORCID**

Sanmei Chen <https://orcid.org/0000-0003-0811-1701>

## Figure legends

**Figure 1.** The estimated prevalence of double burden of malnutrition (stunted child and overweight mother) in Tanzania by region

**Figure 2.** The estimated prevalence and 95% confidence interval of DBM according to the household wealth index levels among non-achievers and achievers of minimum dietary diversity

The error bar denotes 95% confidence intervals of the prevalence. The poorest group was combined with the poorer group as there was only 1 case of DBM in the poorest group among those who achieved minimum dietary diversity.

\*The trend of the association was assessed by assigning ordinal numbers to each group of the household wealth index and modeling this variable as a continuous variable.

DBM=double burden of malnutrition.

**Table 1** Characteristics according to the household wealth index among non-achievers and achievers of minimum dietary diversity.

|                                | Non-achievers of minimum dietary diversity |            |            |            |            | <i>p</i> value | Achievers of minimum dietary diversity |            |            |            |            | <i>p</i> value |
|--------------------------------|--------------------------------------------|------------|------------|------------|------------|----------------|----------------------------------------|------------|------------|------------|------------|----------------|
|                                | Poorest                                    | Poorer     | Middle     | Richer     | Richest    |                | Poorest                                | Poorer     | Middle     | Richer     | Richest    |                |
| Number of mother-child pairs   | 544                                        | 498        | 441        | 352        | 320        |                | 89                                     | 79         | 97         | 171        | 176        |                |
| Mean age of mother (SE), years | 28.3 (0.3)                                 | 28.1 (0.4) | 27.9 (0.4) | 27.0 (0.4) | 27.4 (0.5) | 0.03           | 27.8 (0.9)                             | 27.9 (0.8) | 28.5 (0.8) | 27.2 (0.6) | 28.9 (0.5) | 0.35           |
| Mean age of child (SE), months | 14.0 (0.3)                                 | 13.9 (0.3) | 14.0 (0.3) | 14.1 (0.3) | 14.4 (0.4) | 0.32           | 14.1 (0.5)                             | 13.7 (0.6) | 15.3 (0.4) | 14.7 (0.4) | 14.4 (0.4) | 0.54           |
| Sex of child (female), % (SE)  | 49.9 (2.5)                                 | 49.3 (2.7) | 48.3 (3.0) | 49.3 (2.9) | 46.0 (3.5) | 0.91           | 42.6 (6.9)                             | 57.9 (7.0) | 47.1 (6.0) | 55.3 (4.8) | 46.7 (4.4) | 0.30           |
| Mother's education, % (SE)     |                                            |            |            |            |            | <0.001         |                                        |            |            |            |            | <.0001         |
| No completed education         | 36.3 (3.0)                                 | 28.3 (2.7) | 18.9 (2.1) | 11.8 (2.0) | 1.3 (0.5)  |                | 26.0 (5.4)                             | 35.4 (6.2) | 5.1 (2.4)  | 6.7 (2.3)  | 0.8 (0.5)  |                |
| Primary education              | 59.2 (3.1)                                 | 65.9 (2.6) | 70.9 (2.5) | 68.8 (2.5) | 51.8 (3.7) |                | 70.0 (5.6)                             | 60.3 (6.3) | 84.8 (3.8) | 61.6 (4.4) | 38.0 (4.6) |                |
| Secondary education or above   | 4.5 (1.1)                                  | 5.8 (1.3)  | 10.2 (1.8) | 19.4 (2.1) | 46.9 (3.7) |                | 4.0 (1.9)                              | 4.3 (2.3)  | 10.1 (3.1) | 31.7 (4.2) | 61.2 (4.6) |                |
| Current marital status, % (SE) |                                            |            |            |            |            | <0.001         |                                        |            |            |            |            | 0.50           |
| Never married                  | 3.1 (0.8)                                  | 4.6 (1.1)  | 8.3 (1.7)  | 17.8 (2.4) | 14.5 (2.6) |                | 2.3 (1.8)                              | 9.7 (5.1)  | 7.9 (2.7)  | 9.8 (2.8)  | 5.2 (1.6)  |                |

|                                                      |               |               |               |               |               |        |               |               |               |               |               |        |
|------------------------------------------------------|---------------|---------------|---------------|---------------|---------------|--------|---------------|---------------|---------------|---------------|---------------|--------|
| Currently married                                    | 62.6<br>(2.9) | 61.9<br>(3.1) | 51.2<br>(3.1) | 49.2<br>(3.1) | 62.3<br>(4.0) |        | 70.1<br>(5.8) | 54.1<br>(6.0) | 63.4<br>(5.5) | 62.8<br>(4.7) | 66.3<br>(4.3) |        |
| Formerly married                                     | 34.3<br>(2.8) | 33.5<br>(3.0) | 40.5<br>(2.8) | 33.0<br>(3.2) | 23.2<br>(3.3) |        | 27.6<br>(5.6) | 36.2<br>(5.6) | 28.7<br>(5.0) | 27.4<br>(4.1) | 28.4<br>(4.2) |        |
| Mean number of living children in the household (SE) | 3.9 (0.1)     | 3.6 (0.1)     | 3.5 (0.1)     | 2.7 (0.1)     | 2.2 (0.1)     | <0.001 | 3.5 (0.2)     | 3.7 (0.3)     | 3.4 (0.2)     | 2.8 (0.1)     | 2.2 (0.1)     | <0.001 |
| Mean number of household members (SE)                | 8.5 (0.4)     | 7.3 (0.3)     | 7.4 (0.3)     | 6.7 (0.3)     | 6.7 (0.2)     | <0.001 | 8.8 (0.8)     | 8.0 (0.6)     | 6.6 (0.3)     | 6.1 (0.3)     | 5.8 (0.2)     | <0.001 |
| Place of residence (urban), % (SE)                   | 5.2 (1.9)     | 1.9 (0.7)     | 7.8 (1.5)     | 50.9<br>(3.7) | 85.1<br>(3.0) | <0.001 | 6.8 (2.6)     | 2.7 (2.1)     | 10.1<br>(3.4) | 40.5<br>(4.6) | 88.3<br>(2.6) | <0.001 |
| Currently breastfeeding mother, % (SE)               | 89.5<br>(1.8) | 85.6<br>(1.8) | 84.8<br>(1.9) | 81.7<br>(2.3) | 75.3<br>(2.8) | <0.001 | 98.1<br>(1.6) | 97.1<br>(2.0) | 95.7<br>(2.2) | 87.8<br>(3.0) | 87.8<br>(3.2) | 0.01   |
| Food groups being fed (yes), % (SE)                  |               |               |               |               |               |        |               |               |               |               |               |        |
| Breastmilk                                           | 85.5<br>(1.9) | 81.7<br>(1.9) | 81.5<br>(2.0) | 76.8<br>(2.6) | 70.5<br>(3.1) | <0.001 | 98.1<br>(1.6) | 96.9<br>(2.0) | 94.8<br>(2.3) | 86.7<br>(3.0) | 87.8<br>(3.2) | 0.01   |
| Grains, roots and tubers                             | 81.3<br>(2.0) | 85.0<br>(1.9) | 88.9<br>(1.9) | 91.0<br>(1.8) | 87.7<br>(2.4) | 0.01   | 98.9<br>(1.1) | 96.2<br>(2.3) | 96.6<br>(2.0) | 99.5<br>(0.5) | 97.8<br>(1.6) | 0.43   |
| Legumes and nuts                                     | 21.6<br>(2.3) | 26.9<br>(2.6) | 31.4<br>(2.7) | 33.5<br>(3.1) | 23.8<br>(3.1) | 0.01   | 72.5<br>(5.7) | 79.6<br>(4.7) | 71.7<br>(5.7) | 72.2<br>(4.1) | 67.3<br>(3.7) | 0.51   |



|                                               |               |               |               |               |               |        |               |               |               |               |               |        |
|-----------------------------------------------|---------------|---------------|---------------|---------------|---------------|--------|---------------|---------------|---------------|---------------|---------------|--------|
| Dairy products                                | 22.1<br>(2.0) | 15.1<br>(2.1) | 8.8<br>(1.7)  | 9.4<br>(1.6)  | 24.7<br>(3.2) | <0.001 | 50.7<br>(6.4) | 37.2<br>(6.0) | 39.0<br>(6.0) | 43.3<br>(4.9) | 48.6<br>(4.5) | 0.45   |
| Flesh foods                                   | 16.6<br>(2.1) | 15.1<br>(1.9) | 20.1<br>(2.4) | 28.1<br>(2.6) | 38.7<br>(3.4) | <0.001 | 45.5<br>(6.3) | 63.0<br>(6.7) | 62.6<br>(5.5) | 72.7<br>(4.0) | 76.0<br>(3.9) | <0.001 |
| Eggs                                          | 1.9 (0.6)     | 1.8 (0.7)     | 2.1 (0.7)     | 2.9 (1.1)     | 7.4 (2.1)     | <0.001 | 10.0<br>(3.3) | 14.5<br>(4.2) | 20.9<br>(4.8) | 24.5<br>(4.3) | 34.7<br>(5.3) | <0.001 |
| Vitamin A rich<br>fruits and<br>vegetables    | 53.0<br>(3.0) | 57.3<br>(2.9) | 58.7<br>(3.0) | 54.4<br>(3.5) | 57.3<br>(3.3) | 0.58   | 96.1<br>(2.7) | 91.1<br>(3.7) | 92.4<br>(2.8) | 91.7<br>(2.3) | 95.3<br>(1.7) | 0.58   |
| Other fruits and<br>vegetables                | 11.2<br>(1.6) | 10.2<br>(1.5) | 11.1<br>(2.1) | 10.6<br>(1.9) | 15.2<br>(2.5) | 0.48   | 38.2<br>(6.3) | 43.7<br>(6.7) | 49.7<br>(5.7) | 54.0<br>(5.1) | 59.3<br>(4.3) | 0.05   |
| Mean BMI of mother<br>(SE), kg/m <sup>2</sup> | 21.4<br>(0.1) | 21.7<br>(0.1) | 22.2<br>(0.2) | 22.9<br>(0.2) | 25.2<br>(0.4) | <0.001 | 21.1<br>(0.3) | 22.0<br>(0.4) | 22.5<br>(0.4) | 24.5<br>(0.6) | 26.8<br>(0.6) | <0.001 |
| Mean height-for-age<br>Z-score of child (SE)  | -1.4<br>(0.1) | -1.4<br>(0.1) | -1.5 (0.1)    | -1.3 (0.1)    | -1.0 (0.1)    | 0.02   | -1.5 (0.2)    | -1.4 (0.2)    | -1.6 (0.2)    | -1.3 (0.1)    | -0.7 (0.1)    | <0.001 |

Values are frequency (%) or mean. Frequencies, means, and SEs are weighted using the sampling weights. BMI = body mass index; SE = standard error.

**Table 2** Associations between household wealth index and the double burden of malnutrition (stunted child with overweight/obese mother) among non-achievers and achievers of minimum dietary diversity (MDD)

| Unadjusted analyses                                           |                  |                          |                   |                                                       | Adjusted analyses              |                |                          |                |                                                       |  |
|---------------------------------------------------------------|------------------|--------------------------|-------------------|-------------------------------------------------------|--------------------------------|----------------|--------------------------|----------------|-------------------------------------------------------|--|
| Non-achievers of MDD (n=2,278)                                | <i>p</i> value   | Achievers of MDD (n=614) | <i>p</i> value    | <i>p</i> for interaction between wealth index and MDD | Non-achievers of MDD (n=2,278) | <i>p</i> value | Achievers of MDD (n=614) | <i>p</i> value | <i>p</i> for interaction between wealth index and MDD |  |
| OR (95% CI)                                                   |                  | OR (95% CI)              |                   |                                                       | OR (95% CI)                    |                | OR (95% CI)              |                |                                                       |  |
| <i>Quintiles of wealth index</i>                              |                  |                          |                   |                                                       |                                |                |                          |                |                                                       |  |
| Poorest & poorer*                                             | 1.00 (ref)       |                          | 1.00 (ref)        |                                                       | 1.00 (ref)                     |                | 1.00 (ref)               |                |                                                       |  |
| Middle                                                        | 2.00 (1.09-3.68) | 0.03                     | 0.95 (0.19-4.66)  | 0.95                                                  | 1.98 (1.07-3.66)               | 0.03           | 0.84 (0.20-3.55)         | 0.81           | 0.01                                                  |  |
| Richer                                                        | 1.56 (0.82-2.96) | 0.17                     | 3.52 (1.18-10.50) | 0.02                                                  | 1.88 (0.88-4.03)               | 0.10           | 4.94 (1.30-18.81)        | 0.02           |                                                       |  |
| Richest                                                       | 3.89 (2.20-6.89) | <0.001                   | 1.86 (0.57-6.07)  | 0.30                                                  | 5.38 (2.00-14.48)              | 0.001          | 2.06 (0.34-12.51)        | 0.43           |                                                       |  |
| <i>p</i> for trend†                                           | <0.001           |                          | 0.11              |                                                       | 0.002                          |                | 0.15                     |                |                                                       |  |
| <i>Wealth index score (continuous, per 1 point increment)</i> |                  |                          |                   |                                                       |                                |                |                          |                |                                                       |  |
|                                                               | 1.62 (1.31-2.01) | <0.001                   | 1.25 (0.90-1.73)  | 0.19                                                  | 2.05 (1.32-3.19)               | 0.002          | 1.39 (0.76-2.54)         | 0.29           |                                                       |  |

CI=confidence interval; DBM=double burden of malnutrition; OR=odds ratio. Adjusted models were adjusted for mother's age (in years), education (no completed education, completed primary education, or completed secondary education and above), marital status (never married, currently married, formerly married), place of residence (urban or rural), whether the mother was currently breastfeeding a child (yes or no), number of children in the household, child's age (in months) and sex (male or female), and number of household members.

\*The poorest group was combined with the poorer group as there was only 1 case of DBM in the poorest group among those who achieved minimum dietary diversity to build the logistic regression model.

†Trend association was assessed by assigning ordinal numbers to each group of household wealth index and modelling this variable as a continuous variable.

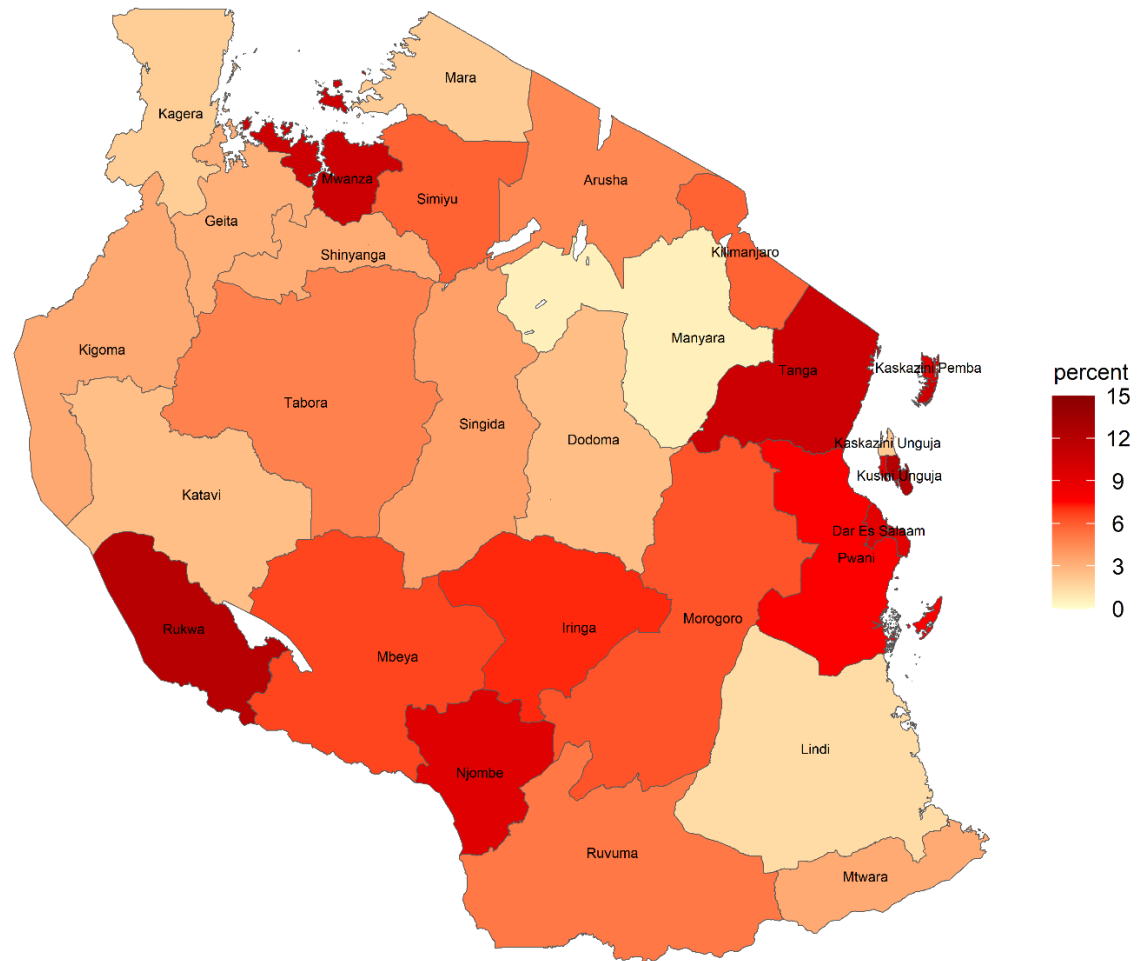

**Figure 1.** The estimated prevalence of double burden of malnutrition (stunted child and overweight mother) in Tanzania by region

**Non-achievers of minimum dietary diversity**

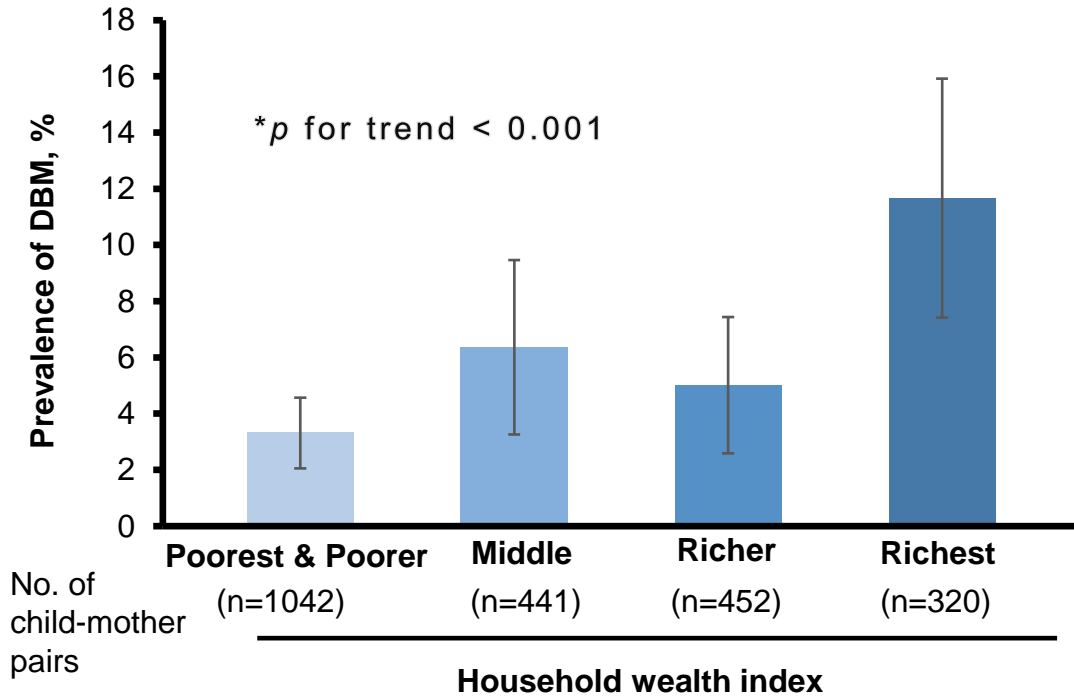

**Achievers of minimum dietary diversity**

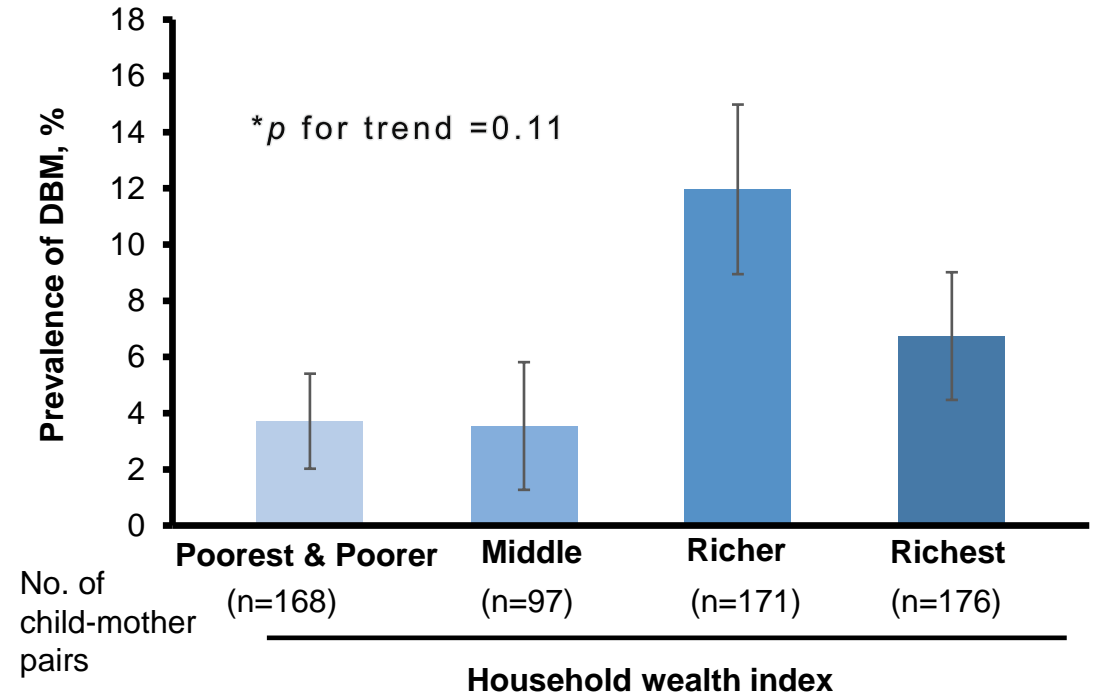

**Figure 2. The estimated prevalence and 95% confidence interval of the DBM according to the household wealth index levels among non-achievers and achievers of minimum dietary diversity**
